# Supplementary material
Source: PubMed Central journal article supplement (PMC7450104)
Supplement: supp_RA120.014027_160366_2_supp_557986_qcsdtr.pdf [file supp_RA120.014027_160366_2_supp_557986_qcsdtr.pdf]

### **Supporting Information 1: List of primers**

|                               |                               |                          |                                                  |
|-------------------------------|-------------------------------|--------------------------|--------------------------------------------------|
| <b>PGs</b>                    | cloning into pIB/V5-His-TOPO  | pPICZA_FpPG_EcoRI_F      | attagaattcGATCCCTGCTCCGTGACTG                    |
|                               |                               | pIB_FpPG_TOPO_R          | GCTGGGGCAAGTGTGGTAG                              |
|                               | cloning into pMIB/V5-His B    | pMIB_AnPGII_HindIII_F    | taataagcttaGACAGCTGCACGTTACC                     |
|                               |                               | pMIB_AnPGII_SacII_R      | attaccgcggaACAAGAGGCCACCGAAGG                    |
|                               | cloning into pPICZ $\alpha$ A | pPICZA_FpPG_EcoRI_F      | attagaattcGATCCCTGCTCCGTGACTG                    |
|                               |                               | pPICZA_FpPG_XbaI_R       | taattctagattGCTGGGGCAAGTGTGGTAG                  |
|                               |                               | pPICZA_AnPGII_EcoRI_F    | taatgaattcGACAGCTGCACGTTACCAC                    |
|                               |                               | pPICZA_AnPGII_NotI_R     | attagcggccgcTCAATGGTGATGGTGATGATG                |
| <b>PGIPs</b>                  | cloning into pPICZ $\alpha$ A | pPICZA_PvPGIP2_EcoRI_F   | attagaattcGAGCTATGCAACCCACAAGAC                  |
|                               |                               | pPICZA_PvPGIP2_XbaI_R    | taattctagattCTCCTCTCCTGCCTGCACT                  |
|                               |                               | pPICZA_BrPGIP3_PmlI_F    | taatcacgtggAAAGATCTCTGTCACAAAGATGAC              |
|                               |                               | pPICZA_BrPGIP3_NotI_R    | taatgcgccgcCTTGCAACTCTGAAGAGGTGCATCAC            |
|                               | cloning into pKLAC2           | pKLAC_BrPGIP3_NdeI_F     | attacatatgAAAGATCTCTGTCACAAAGATGAC               |
|                               |                               | pKLAC_His,myc_BamHI_R    | attaggatccttaatgatgatgatgATGATGATGATGATGATGGTTCG |
|                               | cloning into pMIB/V5_GPI      | pMIB_GPI_PvPGIP2_SphI_F  | attagcatgctaGAGCTATGCAACCCACAAGAC                |
|                               |                               | pMIB_GPI_BrPGIP3_SphI_F  | taatgcatgctaAAAGATCTCTGTCACAAAGATGAC             |
|                               |                               | pMIB_GPI_His,myc_BamHI_R | attaggatccATGATGATGATGATGATGGTCGACG              |
| <b>pMIB/V5_GPI generation</b> |                               | GPI-HarAPN_BamHI_F       | taatggatccCTACGACCACAACACTACAGAAGC               |
|                               |                               | GPI-HarAPN_NotI_STOP_R   | attagcggccgcTTAAGCCATATTAACAACGAGAGTCACG         |

Upper case letters represent GOI ORF sequence in the primer, lower case restriction sites and spacer nucleotides.



### Supporting Information 3: Full sequence of pMIB/V5\_GPI

-  pMIB/V5 A (Thermo Fischer Scientific GmbH, Bonn, Germany)
-  honeybee melittin secretion signal
-  BamHI/NotI restriction site
-  remaining MCS (including SphI, HindIII, Asp718I, KpnI, SacI restriction sites)
-  spacer
-  omega site
-  GPI anchor transmembrane domain + Stop (TAA)

CATGATGATAACAATGTATGGTGCTAATGTTGCTTCAACAACAATTCTGTTGAACTGTGTTTTTCATGTTTTGCCA  
ACAAGCACCTTTATACTCGGTGGCCTCCCCACCACCACTTTTTTGCCTGCAAAAAAACACGCTTTTTGCACGCG  
GGCCATACATAGTACAACTCTACGTTTTCGTAGACTATTTTACATAAATAGTCTACACCGTTGTATACGCTCCA  
AATACACTACCACACATTGAACCTTTTTGTCAGTGCAAAAAAGTACGTGTGGCAGTCACGTAGGCCGGCCTTATC  
GGGTGCGTCTGTACGTACGAATCACATTATCGGACCGGACGAGTGTGTCTTATCGTGACAGGACGCCAGCT  
TCCTGTGTTGCTAACCGCAGCCGGACGCAACTCCTTATCGGAACAGGACGCGCCTCCATATCAGCCGCGCTTAT  
CTCATGCGCTGACCGGACACGAGGCGCCGCTCCCGCTTATCGCGCCTATAAATACAGCCCGCAACGATCTGGTA  
AACACAGTTGAACAGCATCTGTTTGAATTTAAAGCTACCATGAAATTTCTTAGTCAACGTTGCCCTTGTTTTTATG  
GTCGTATACATTTCTTACATCTATGCCGGCATGCTAAGCTTGGTACCGAGCTCGGATCCCTACGACCACAACCTA  
CAGAAGCTACAACAACACCTGTACCTGGCTCAGCAAAACATCGCCACTCTTAGCATCGTCACAATGATCGTGACTC  
TCGTTGTTAATATGGCTTAAAGCGGCGCTCGAGTCTAGAGGGCCCTTGAAGGTAAGCCTATCCCTAACCTCTC  
CTCGGTCTCGATTCTACGCGTACCGGTATCATACCATACCATGAGTTTATCTGACTAAATCTTAGTTTGTA  
TTGTCATGTTTTAATAACAATATGTTATGTTTAAATATGTTTTAATAAATTTTATAAAATAATTTCAACTTTTAT  
TGTAACAACATTGTCCATTTACACACTCCTTTCAAGCGCTGGGATCGATGCTCACTCAAAGCGGTAATACGGT  
TATCCACAGAATCAGGGGATAACGCAGGAAAGAACATGTGAGCAAAAGGCCAGCAAAAGCCAGGAACCGTAAAA  
AGGCCGCTTGTGCGTTTTTCCATAGGCTCCGCCCCCTGACGAGCATCACAAAAATCGACGCTCAAGTCAGA  
GGTGGCGAAACCCGACAGGACTATAAAGATAACCAGGCGTTTTCCCCCTGGAAGCTCCCTCGTGCGCTCTCCTGTT  
CGACCCTGCCGTTACCGGATACCTGTCCGCTTTCTCCCTTCCGGAAGCGTGGCGCTTTCTCATAGCTCACGCT  
GTAGGTATCTCAGTTCGGTGTAGGTGCTTCCGCTCCAAGCTGGGCTGTGTGCACGAACCCCCGTTACGCCGACC  
GCTGCGCTTATCCGGTAACTATCGTCTTGAAGTCCAACCCGGTAAGACACGACTTATCGCCACTGGCAGCAGCCA  
CTGGTAACAGGATTAGCAGAGCGAGGTATGTAGGCGGTGCTACAGAGTTCCTTGAAGTGGTGGCTAACTACGGCT  
ACACTAGAAGAACAGTATTTGGTATCTGCGCTCTGCTGAAGCCAGTTACCTTCGAAAAAGAGTTGGTAGCTCTT  
GATCCGGCAAAACAACCCAGCTGGTAGCGGTGGTTTTTTTTGTTTGAAGCAGCAGATTACGCGCAGAAAAAAG  
GATCTCAAGAAGATCCTTTGATCTTTTCTACGGGGTCTGACGCTCAGTGAACGAAAACCTCACGTTAAGGGATT  
TGGTCATGCGAAACACGCACGGCGCGCACGCAGCTTAGCACAAACCGCTCGTTGACAGCGCCACCCTAACC  
GCAGGCCAATCGGTGCGCCGGCCTCATATCCGCTCACAGCCGCTCCTATCGGGCGCGGCTTCCGCGCCCATTT  
TGAATAAATAAACGATAACGCCGTTGGTGGCGTGAGGCATGTAAGGTTACATCATTATCTTGTTCGCCATCCG  
GTTGGTATAAATAGACGTTTATGTTGGTTTTTGTTCAGTTGCAAGTTGGCTGCGGCGCGCAGCACCTTTGCC  
GGGATCTGCCGGGTGACGACGTTGACAATTAATCATCGGCATAGTATATCGGCATAGTATAATACGACAAG  
GTGAGGAATAAACCTAGGCAAGCCTTTGTCTCAAGAAGAATCCACCCTCATTGAAAGAGCAACGGCTACAATC  
AACAGACTCCCCATCTCTTAAGACTACAGCGTCGCCAGCGCAGCTCTCTTAGCGACGGCCGATCTTCACTGGT  
GTCAATGTATATCATTTTACTGGGGACCTTGCAGCAGAACTCGTGGTGTGCGGCACTGCTGCTGCGGACGCT  
GGCAACCTGATTTGTATCGTTCGCGATCGGAAATGAGAACAGGGGCATCTTGAGCCCCCTGCGGACGGTCCGACAG  
GTTCTTCTCGATCTGCATCCTGGGATCAAAGCCATAGTGAAGGACAGTGATGGACAGCCGACGGCAGTTGGGATT  
CGTGAATTGCTGCCCTCTGGTTATGTGTGGGAGGGCTAAGCACTTCTGTTGGCCGAGGAGCAGGACTGACACGTTCC  
GGGAGATCTGCATGTCTACTAACTCACAAATTAGAGCTTCAATTTAATTATATCAGTTATTACCCATTGAAAAA  
GGAAGAGTATGAGTATTCAACATTTCCGTGTGCCCTTATTCCCTTTTTTGGCGCATTTTGCCTTCTGTTTTTGT  
CTCACCCAGAAACGCTGGTGAAGTAAAAGATGCTGAAGATCAGTTGGGTGACGAGTGGGTTACATCGAACTGG  
ATCTCAACAGCGGTAAGATCCTTGAGAGTTTTTCGCCCCGAAGAACGTTTTTCCAATGATGAGCACTTTTAAAGTTC  
TGCTATGTGGCGCGGTATTATCCCGTATTGACGCCGGGCAAGAGCAACTCGGTGCGCCGATACACTATTCTCAGA  
ATGACTTGGTTGAGTACTCACCAGTCACAGAAAAGCATCTTACGGATGGCATGACAGTAAGAGAATTATGCACTG  
CTGCCATAACCATGAGTGATAACACTGCGGCCAACTTACTTCTGACAACGATCGGAGGACCGAAGGAGCTAACCC  
CTTTTTTGCACAACATGGGGGATCATGTAACCTCGCCTTGATCGTTGGGAACCCGGAGCTGAATGAAGCCATACCAA  
ACGACGAGCGTGACACCACGATGCCTGTAGCAATGGCAACAACGTTGCGCAAACTATTAACCTGGCGAACTACTTA  
CTCTAGCTTCCCGGCAACAATTAATAGACTGGATGGAGGCGGATAAAGTTGCAGGACCACTTCTGCGCTCGGCC  
TTCCGGCTGGCTGGTTTTATTGCTGATAAATCTGGAGCCGGTGAGCGTGGGTCTCGCGGTATCATTGCAGCACTGG  
GGCCAGATGGTAAGCCCTCCCGTATCGTAGTTATCTACACGACGGGGAGTCAGGCAACTATGGATGAACGAAATA  
GACAGATCGCTGAGATAGGTGCCTCACTGATTAAGCATTGGTAACTGTGACACCAAGTTTACTCATATATACTTT  
AGATTGATTTAAACTTCATTTTTAATTTAAAGGATCTAGGTGAAGATCCTTTTTGATAATCT

## Supporting Information 4: Figures

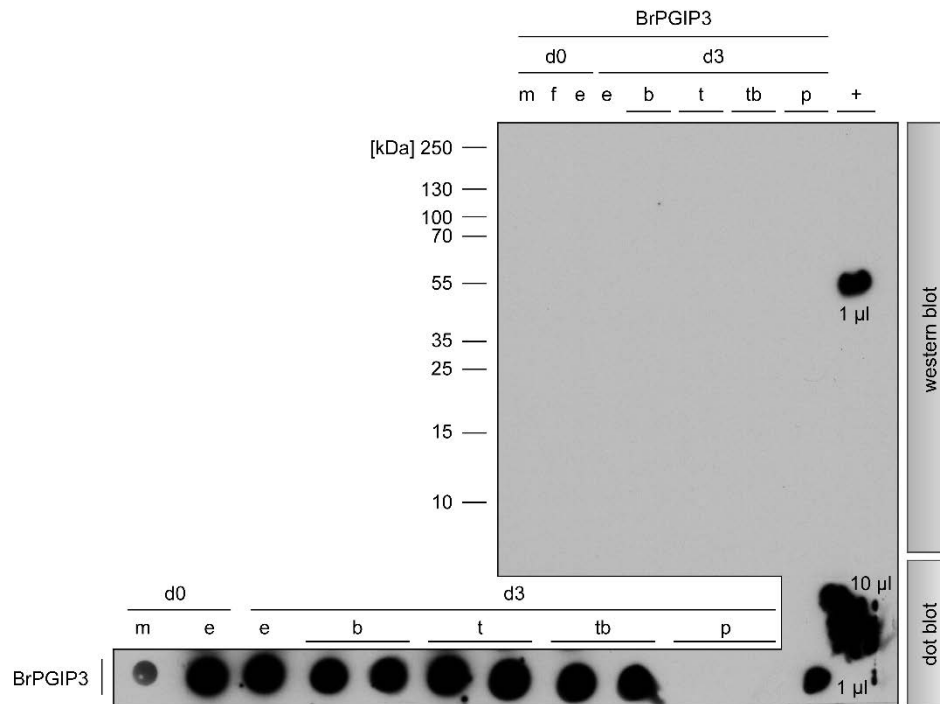

**Figure S1: Comparison of signal intensities on western and dot blot indicate an aggregation of the soluble BrPGIP3.** Equal volumes of culture medium (m) from yeast expression, flow-through (f) and elution (e) of purification were applied onto a western blot and a dot blot. Samples were taken on the day of harvest and purification (d0) and elution fractions were stored under different conditions at 4°C for 3 days (d3). The elution fractions were supplemented with 1 and 5 μg/μl BSA (b), 0.001 and 0.1% Tween20 (t), 1 and 5 μg/μl BSA + 0.01% Tween20 (tb) and 0.2 and 0.5% PGA (p). An anti-His<sub>6</sub> antibody detects both BrPGIP3 as well as the positive control PCO\_GH28-1 (+). This stable protein results in a band and dot of corresponding size on the western and dot blot (1 μl), when simultaneously developed on the same film.

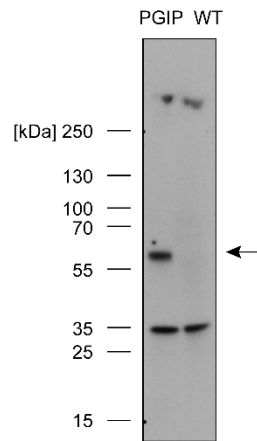

**Figure S2: Comparison of membrane preparations from BrPGIP3\_GPI-expressing and wild type Sf9 insect cells.** Membrane proteins from BrPGIP3\_GPI-expressing (PGIP) as well as wild type (WT) Sf9 cells were applied onto a western blot and the proteins were detected with an anti-myc antibody. The arrow indicates the expected size of BrPGIP3\_GPI.

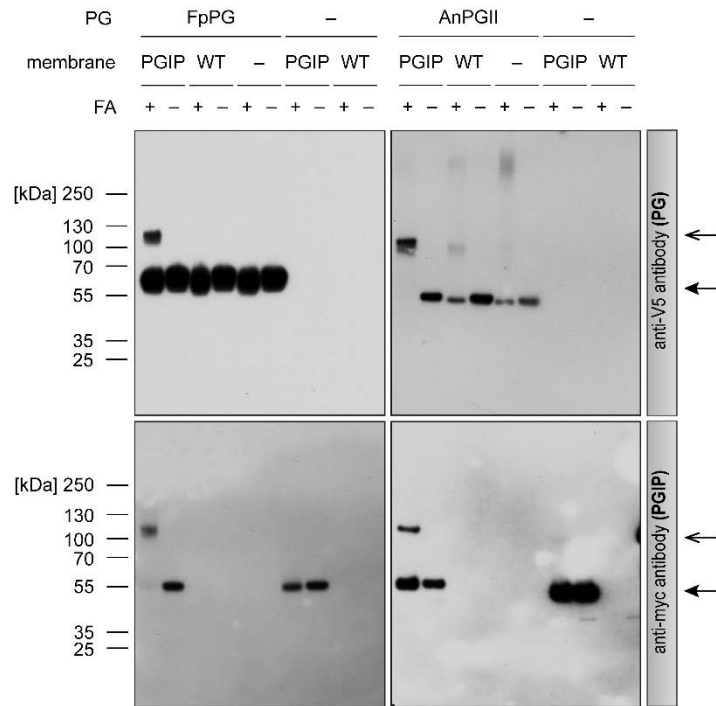

**Figure S3: Both fungal PGs, FpPG and AnPGII, specifically interacted with PvPGIP2\_GPI.** Membrane proteins from wild type (WT) as well as PvPGIP2\_GPI-expressing Sf9 cells were incubated with FpPG as well as AnPGII and cross-linked with formaldehyde (FA). The PGs can be detected with an anti-V5 antibody (top) and the PGIP with an anti-myc antibody (bottom). Arrows indicate the expected size of PG or PGIP alone (closed arrowhead) and the PG-PGIP complex (open arrowhead), respectively. Note that the Western blots using the anti-V5 antibody (upper panels) are also used in Figure 3 panels A and C.

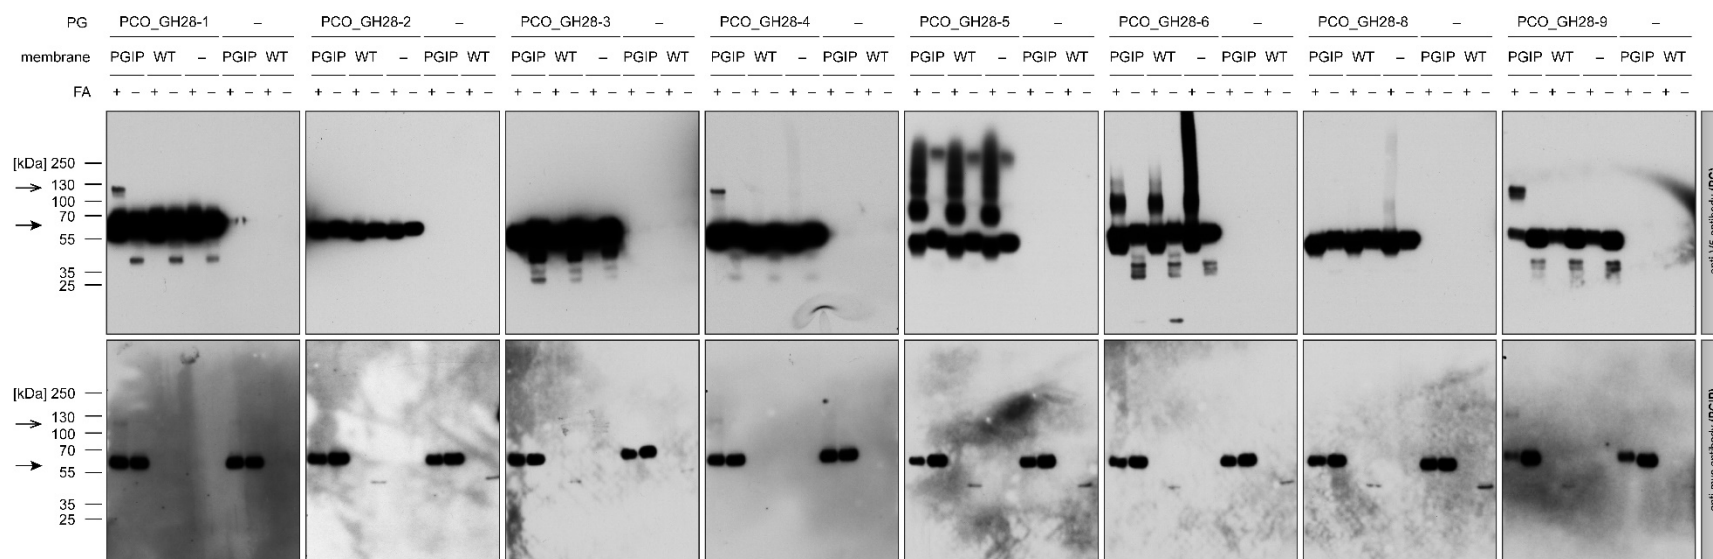

**Figure S4: Interaction assay of BrPGIP3\_GPI with the beetle PG family members reveals specific interaction of PCO\_GH28-1, -4 and -9 with BrPGIP3\_GPI.** Membrane proteins from BrPGIP3\_GPI-expressing as well as wild type (WT) Sf9 cells were incubated with PCO\_GH28-1-9 (except PCO\_GH28-7) and cross-linked with formaldehyde (FA). The PGs can be detected with an anti-V5 antibody (top) and the PGIP with an anti-myc antibody (bottom). Arrows indicate the expected size of PG or PGIP alone (closed arrowhead) and the PG-PGIP complex (open arrowhead), respectively. Note that the Western blots using the anti-V5 antibody (upper panels) for PCO\_GH28-1, PCO\_GH28-5 and PCO\_GH28-9 are also used in Figure 4 panels A, C and E respectively.

**Supporting Information 5: Table**

**Table S1. Inhibitory activity of PvPGIP\_GPI and BrPGIP3\_GPI on the fungal FpPG and AnPGII as well as the *P. cochleariae* gut content and PGs PCO\_GH28-1, -5 and -9.**

| membrane protein | FpPG |        | AnPGII |      | PCO_GH28-1 |     | PCO_GH28-5 |     | PCO_GH28-9 |     | gut content |     |        |
|------------------|------|--------|--------|------|------------|-----|------------|-----|------------|-----|-------------|-----|--------|
|                  | [μg] | %      | p      | %    | p          | %   | p          | %   | p          | %   | p           |     |        |
| 5                |      |        |        | 75*  | =0.001     |     |            |     |            |     |             |     |        |
| 10               |      |        |        | 83*  | ≤0.001     |     |            |     |            |     |             |     |        |
| 25               | -8   | n.s.   |        | 91*  | ≤0.001     | -3  | n.s.       | 1   | n.s.       | 0   | n.s.        | -6  | n.s.   |
| 50               | 12   | n.s.   |        | 100* | ≤0.001     | 2   | n.s.       | -1  | n.s.       | 5   | n.s.        | 13  | n.s.   |
| 100              | 25   | n.s.   |        |      |            | 15* | ≤0.001     | 7   | n.s.       | 10* | =0.006      | 17* | ≤0.001 |
| 150              | 58*  | ≤0.001 |        |      |            | 20* | ≤0.001     | 18* | =0.015     | 14* | ≤0.001      | 18* | ≤0.001 |
| 200              | 80*  | ≤0.001 |        |      |            | 22* | =0.001     | 13* | =0.043     | 16* | =0.002      | 19* | ≤0.001 |
| 250              | 83*  | ≤0.001 |        |      |            | 38* | ≤0.001     | 13* | =0.002     | 11  | n.s.        | 18* | ≤0.001 |
| 300              |      |        |        |      |            | 51* | ≤0.001     | 13  | n.s.       | 22* | ≤0.001      | 33* | ≤0.001 |

The inhibitory activity is displayed as the % reduction of PG activity by PGIP-containing membrane proteins compared to an equal amount of wild type membrane proteins. The corresponding samples (n=3) were compared with a Student's t-test or rank sum test (Mann-Whitney). Significantly different samples are marked with an asterisk. n.s., not significant; empty cells, not tested.
